# Supplementary material for: Structures and properties of large supramolecular coordination complexes predicted with the generalized energy-based fragmentation method
Source: Royal Society of Chemistry journal article supplement (doi:10.1039/c8cp05548c), 2018-01-01
Supplement: c8cp05548c1.pdf [file c8cp05548c1.pdf]

## Electronic supplementary information (ESI)

### Structures and properties of large supramolecular coordination complexes predicted with the generalized energy-based fragmentation method

Dandan Yuan, Yunzhi Li, Wei Li, Shuhua Li\*

*School of Chemistry and Chemical Engineering, Key Laboratory of Mesoscopic Chemistry of*

*Ministry of Education, Institute of Theoretical and Computational Chemistry, Nanjing University,*

*Nanjing 210023, People's Republic of China.*

shuhua@nju.edu.cn

### Contents

|                                                                                                                                                                                                                       |    |
|-----------------------------------------------------------------------------------------------------------------------------------------------------------------------------------------------------------------------|----|
| <b>Table S1</b> Comparison of relative energies calculated with the GEBF-M06-2X and conventional M06-2X methods for six conformers of $M_7(\text{timb})_2(\text{tim})_2$ . .....                                      | 2  |
| <b>Table S2</b> Comparison of Pd-N bond lengths around seven $\text{Pd}^{2+}$ ions in $M_7(\text{timb})_2(\text{tim})_2$ optimized with the GEBF-M06-2X and conventional M06-2X methods. ....                         | 3  |
| <b>Table S3</b> The average lengths of coordinate bonds between different metal ions and (terminal, central) pyridinyl groups in $\text{Fe}_2\text{Zn}_2(\text{RuL}_2)_2$ optimized with the GEBF-M06-2X method. .... | 4  |
| <b>Fig. S1</b> The superposition of optimized structure obtained with the GEBF-M06-2X method and crystal structure for $\text{Pd}_4\text{L}_8(\text{BF}_4^-)_3$ . ....                                                | 5  |
| <b>Table S4</b> Comparison of Pd-N bond lengths optimized with the GEBF-M06-2X method and corresponding bond lengths in the crystal structure for $\text{Pd}_4\text{L}_8(\text{BF}_4^-)_3$ . ....                     | 6  |
| Cartesian coordinates of $M_7(\text{timb})_2(\text{tim})_2$ .....                                                                                                                                                     | 6  |
| Cartesian coordinates of $\text{Fe}_2\text{Zn}_2(\text{RuL}_2)_2$ .....                                                                                                                                               | 11 |
| Cartesian coordinates of $\text{Pd}_4\text{L}_8(\text{BF}_4^-)_3$ .....                                                                                                                                               | 19 |

**Table S1** Comparison of relative energies (in millihartree) calculated with the GEBF-M06-2X and conventional M06-2X methods for six conformers of  $M_7(\text{timb})_2(\text{tim})_2$ . The LANL2DZ basis set is used for metal atoms and the 6-31G(d,p) basis set is used for H, C, N atoms.

|   | GEBF-M06-2X | Convent. M06-2X | Deviation |
|---|-------------|-----------------|-----------|
| 1 | 0           | 0               | 0.00      |
| 2 | 5.79        | 5.71            | 0.08      |
| 3 | 26.53       | 26.38           | 0.15      |
| 4 | 53.57       | 53.47           | 0.10      |
| 5 | 98.59       | 98.86           | -0.27     |

**Table S2** Comparison of Pd-N bond lengths (in Å) around seven Pd<sup>2+</sup> ions in M<sub>7</sub>(timb)<sub>2</sub>(tim)<sub>2</sub> optimized with the GEBF-M06-2X and conventional M06-2X methods. The 6-31G(d,p) basis set is used for H, C, N atoms and the LANL2DZ basis set is used for metal atoms.

| Pd <sup>2+</sup> center | GEBF-M06-2X            | Convent. M06-2X        |
|-------------------------|------------------------|------------------------|
| 1                       | 2.10, 2.12, 2.29, 2.28 | 2.11, 2.12, 2.26, 2.26 |
| 2                       | 2.09, 2.09, 2.28, 2.28 | 2.09, 2.09, 2.29, 2.29 |
| 3                       | 2.11, 2.13, 2.23, 2.32 | 2.11, 2.12, 2.24, 2.34 |
| 4                       | 2.11, 2.12, 2.26, 2.34 | 2.11, 2.12, 2.25, 2.32 |
| 5                       | 2.12, 2.11, 2.24, 2.30 | 2.12, 2.11, 2.25, 2.32 |
| 6                       | 2.11, 2.13, 2.23, 2.33 | 2.11, 2.12, 2.24, 2.34 |
| 7                       | 2.09, 2.09, 2.28, 2.28 | 2.09, 2.09, 2.30, 2.29 |

**Table S3** The average lengths of coordinate bonds (in Å) between different metal ions and (terminal, central) pyridinyl groups in  $\text{Fe}_2\text{Zn}_2(\text{RuL}_2)_2$  optimized with the GEBF-M06-2X method. The LANL2DZ basis set for metal atoms and 6-31G\*\* basis set for non-metal atoms are employed.

| Metal ion        | terminal | central | terminal |
|------------------|----------|---------|----------|
| $\text{Ru}^{2+}$ | 2.16     | 2.05    | 2.16     |
| $\text{Fe}^{2+}$ | 2.24     | 2.17    | 2.24     |
| $\text{Zn}^{2+}$ | 2.23     | 2.16    | 2.23     |

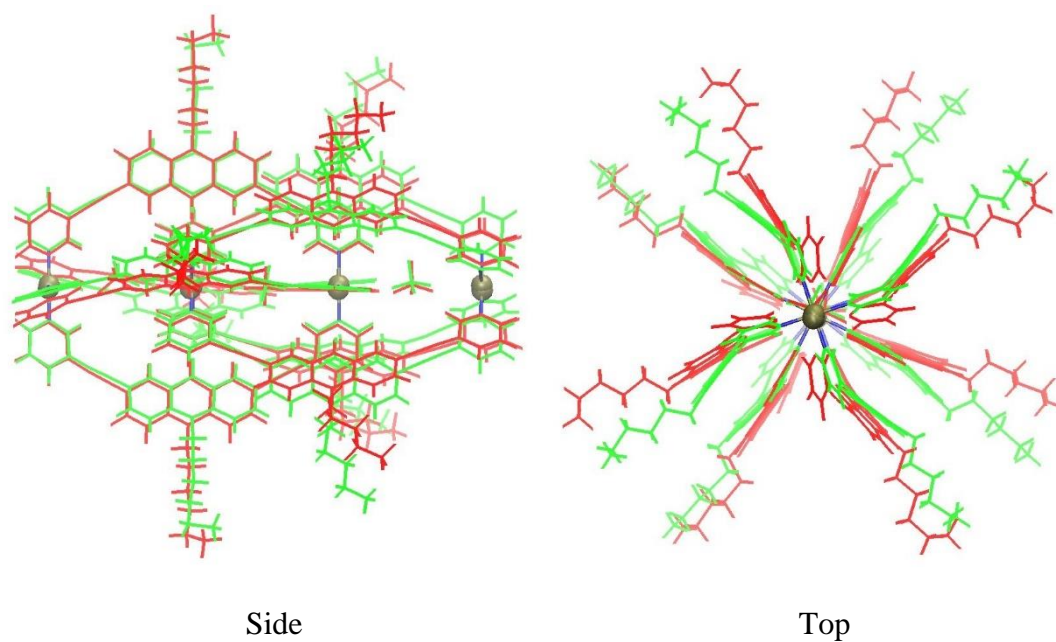

**Fig. S1** The superposition of optimized structure obtained with the GEBF-M06-2X method and crystal structure for  $\text{Pd}_4\text{L}_8(\text{BF}_4)_3$ .

**Table S4** Comparison of Pd-N bond lengths (in Å) optimized with the GEBF-M06-2X method and corresponding bond lengths in the crystal structure for Pd<sub>4</sub>L<sub>8</sub>(BF<sub>4</sub>)<sub>3</sub>. The LANL2DZ basis set is used for Pd atoms and the 6-31G\*\* basis set is used for H, C, N atoms in the GEBF-M06-2X calculations.

| Pd <sup>2+</sup> center | GEBF-M06-2X            | Crystal                |
|-------------------------|------------------------|------------------------|
| 1                       | 2.08, 2.07, 2.08, 2.07 | 2.03, 2.03, 2.03, 2.03 |
| 2                       | 2.06, 2.06, 2.06, 2.06 | 2.02, 2.02, 2.02, 2.02 |
| 3                       | 2.06, 2.06, 2.06, 2.06 | 2.03, 2.03, 2.03, 2.03 |
| 4                       | 2.09, 2.07, 2.07, 2.08 | 2.01, 2.01, 2.01, 2.01 |

| Cartesian coordinates of $M_7(\text{timb})_2(\text{tim})_2$ |           |           |           |
|-------------------------------------------------------------|-----------|-----------|-----------|
| Pd                                                          | 9.035869  | 3.028885  | -0.016511 |
| Pd                                                          | -6.376541 | -2.721148 | 4.573871  |
| Pd                                                          | 3.513254  | -5.522422 | 5.147976  |
| Pd                                                          | -1.774475 | 6.455604  | -5.177649 |
| Pd                                                          | -1.717041 | 6.345369  | 5.332263  |
| Pd                                                          | 3.429270  | -5.424774 | -5.307663 |
| Pd                                                          | -6.450442 | -2.628172 | -4.540850 |
| C                                                           | 0.790329  | 3.210755  | -6.531106 |
| H                                                           | 1.156786  | 2.535441  | -7.289156 |
| N                                                           | 3.546584  | -1.095746 | 5.304600  |
| C                                                           | 2.568846  | 2.450429  | 4.888214  |
| N                                                           | -0.060927 | -5.421797 | 2.387946  |
| N                                                           | -4.925849 | 0.920031  | 2.443896  |
| N                                                           | 3.478872  | -0.996039 | -5.370683 |
| C                                                           | 2.542004  | 1.091806  | 5.205370  |
| H                                                           | 1.698124  | 0.674221  | 5.743990  |
| N                                                           | -4.969129 | 0.979105  | -2.381288 |
| N                                                           | 1.488908  | 3.267263  | 5.366285  |
| C                                                           | 6.188041  | 4.080688  | -3.216923 |
| H                                                           | 5.802370  | 4.748054  | -3.972579 |
| N                                                           | 3.396559  | -3.305288 | 5.365667  |
| N                                                           | -0.239645 | 4.833106  | -5.379325 |
| C                                                           | 3.576581  | 3.045709  | -4.124451 |
| H                                                           | 3.610577  | 4.097326  | -3.859682 |
| N                                                           | -4.124726 | 3.840177  | -2.380588 |
| N                                                           | -4.087419 | 3.778274  | 2.503030  |
| C                                                           | -4.309718 | 3.059678  | 1.285648  |
| N                                                           | 7.422779  | 3.065006  | -1.641943 |
| N                                                           | -4.484066 | -3.436749 | -3.706275 |
| C                                                           | 4.643003  | 0.852144  | -4.166286 |
| H                                                           | 5.517316  | 0.230982  | -3.997271 |
| N                                                           | -4.420595 | -3.514876 | 3.718846  |
| C                                                           | -0.175207 | -5.352723 | -0.051527 |
| H                                                           | 0.757719  | -5.908378 | -0.064801 |
| N                                                           | 7.408542  | 3.063319  | 1.581752  |
| N                                                           | -0.172026 | 4.728368  | 5.491919  |
| N                                                           | -0.102478 | -5.361168 | -2.494913 |
| N                                                           | 1.418823  | 3.365542  | -5.305068 |
| N                                                           | 1.557918  | -5.569073 | 3.902952  |
| N                                                           | -5.658440 | -0.729369 | 3.735484  |
| N                                                           | 5.785356  | 2.721182  | 3.056531  |
| C                                                           | -4.124061 | 3.711605  | 0.059424  |
| H                                                           | -3.877265 | 4.769317  | 0.069449  |
| C                                                           | -4.609498 | -0.091590 | 4.371352  |
| H                                                           | -4.277194 | -0.381638 | 5.357253  |
| C                                                           | 3.546468  | 0.355860  | -4.879041 |
| C                                                           | 3.608357  | 0.266713  | 4.841956  |
| N                                                           | 5.749689  | 2.769728  | -3.071564 |
| C                                                           | 0.879922  | 3.088964  | 6.598893  |
| H                                                           | 1.259631  | 2.401342  | 7.339176  |
| C                                                           | -4.976140 | 3.884775  | 3.563922  |
| H                                                           | -5.972934 | 3.470294  | 3.528512  |
| N                                                           | -3.135388 | 5.074122  | -3.938706 |
| C                                                           | 2.474043  | 1.187494  | -5.207680 |
| H                                                           | 1.623028  | 0.781160  | -5.743706 |
| C                                                           | -0.759541 | -5.068289 | 1.190458  |
| N                                                           | -2.727806 | -4.075187 | 2.397122  |
| N                                                           | 3.324831  | -3.203308 | -5.476913 |
| N                                                           | -3.078703 | 4.980744  | 4.073526  |
| N                                                           | -2.767960 | -4.017238 | -2.424031 |
| C                                                           | -3.232482 | -3.193025 | 4.348517  |
| H                                                           | -3.207543 | -2.773341 | 5.343473  |
| C                                                           | 2.505427  | 2.538538  | -4.860048 |
| C                                                           | -0.779460 | -5.039227 | -1.276741 |
| C                                                           | -4.329105 | 3.089293  | -1.179260 |
| C                                                           | -3.308674 | -3.055267 | -4.326671 |
| H                                                           | -3.302137 | -2.585650 | -5.299356 |
| C                                                           | -2.032816 | -4.456401 | 1.205624  |
| C                                                           | 4.693979  | 0.778593  | 4.123154  |
| H                                                           | 5.565110  | 0.161794  | 3.924465  |
| C                                                           | -5.833741 | -0.098843 | 2.592698  |
| H                                                           | -6.613835 | -0.300899 | 1.871603  |
| C                                                           | 3.102958  | -1.440279 | 6.571375  |
| H                                                           | 2.951257  | -0.706440 | 7.348802  |
| C                                                           | -4.759048 | 1.743959  | -1.190536 |
| N                                                           | -5.719633 | -0.646422 | -3.693632 |
| C                                                           | 3.716393  | -2.261734 | 4.615385  |
| H                                                           | 4.065443  | -2.293139 | 3.593698  |
| C                                                           | -0.140798 | 3.986698  | 6.657941  |
| H                                                           | -0.825294 | 4.163172  | 7.475303  |
| C                                                           | -5.865527 | -0.050615 | -2.528663 |
| H                                                           | -6.616607 | -0.286359 | -1.787541 |
| C                                                           | 4.687846  | 2.135500  | 3.761738  |
| C                                                           | 4.641921  | 2.200197  | -3.772788 |
| C                                                           | -2.244187 | -3.397893 | -3.550542 |
| H                                                           | -1.184426 | -3.261331 | -3.695257 |

|   |           |           |           |   |           |           |           |
|---|-----------|-----------|-----------|---|-----------|-----------|-----------|
| C | -4.142724 | 0.920932  | 3.590247  | H | -4.802982 | -4.483661 | -1.868654 |
| H | -3.343263 | 1.627722  | 3.744392  | C | -0.648662 | -6.009545 | -3.595099 |
| C | 0.337401  | -6.063540 | -4.532324 | H | -1.655136 | -6.400451 | -3.596698 |
| H | 0.286316  | -6.495943 | -5.520809 | C | -5.038402 | 3.994619  | -3.414008 |
| C | 0.818060  | 4.276748  | 4.737407  | H | -6.040752 | 3.594893  | -3.365796 |
| H | 1.082355  | 4.634217  | 3.752453  | C | 7.205798  | 4.245697  | -2.330496 |
| C | 0.760784  | 4.365378  | -4.648193 | H | 7.803028  | 5.131222  | -2.165672 |
| H | 1.041082  | 4.704636  | -3.661245 | C | -4.090583 | -4.049882 | 2.561639  |
| C | 2.925234  | -2.669578 | -6.687902 | H | -4.777753 | -4.464355 | 1.837050  |
| H | 2.603492  | -3.283470 | -7.516421 | C | 3.022540  | -1.312852 | -6.640161 |
| C | -4.738454 | 1.714242  | 1.268608  | H | 2.864273  | -0.562488 | -7.400356 |
| C | -4.411794 | 4.744295  | -4.363340 | C | 7.226022  | 4.216185  | 2.324906  |
| H | -4.804456 | 5.060408  | -5.318195 | H | 7.810978  | 5.110176  | 2.163356  |
| C | -4.338084 | 4.615776  | 4.519925  | C | -4.935820 | 1.093189  | 0.033128  |
| H | -4.711523 | 4.895687  | 5.493710  | H | -5.171250 | 0.035046  | 0.023781  |
| C | -2.052904 | -4.428135 | -1.254179 | C | 1.200463  | -5.070043 | -2.818955 |
| C | 3.629612  | 2.973918  | 4.149005  | H | 1.867954  | -4.558735 | -2.140078 |
| H | 3.661467  | 4.031362  | 3.907916  | C | -4.704304 | 0.026859  | -4.347172 |
| C | 6.238782  | 4.021432  | 3.240132  | H | -4.404300 | -0.228685 | -5.352870 |
| H | 5.881341  | 4.660498  | 4.033541  | N | 5.223208  | -5.614134 | 6.374897  |
| C | -2.991189 | 4.521512  | -2.750820 | N | 5.117977  | -5.504072 | -6.563875 |
| H | -2.110987 | 4.569298  | -2.125851 | N | 10.597136 | 3.124791  | 1.391308  |
| C | -4.226048 | 1.024176  | -3.553670 | N | 10.631960 | 3.048316  | -1.407311 |
| H | -3.441426 | 1.745496  | -3.715433 | N | -8.179976 | -1.858833 | -5.428641 |
| C | 6.538204  | 2.186368  | 2.042115  | N | 3.784509  | -7.627315 | 5.047417  |
| H | 6.407170  | 1.176141  | 1.683299  | N | -0.564481 | 7.664964  | 6.517991  |
| C | 6.541412  | 2.200757  | -2.106590 | N | -3.155421 | 8.051706  | -5.177261 |
| H | 6.429095  | 1.176416  | -1.782693 | N | -6.967362 | -4.516043 | 5.471631  |
| C | -0.580604 | -6.118946 | 3.470790  | N | -7.073824 | -4.421627 | -5.412147 |
| H | -1.580217 | -6.527492 | 3.471325  | N | 3.671859  | -7.534594 | -5.272712 |
| C | 1.240811  | -5.118555 | 2.705087  | N | -0.617814 | 7.791862  | -6.340996 |
| H | 1.888632  | -4.569309 | 2.036896  | C | -0.115208 | 7.068495  | 7.807050  |
| C | -2.956150 | 4.467884  | 2.865719  | H | -0.973109 | 6.666004  | 8.350550  |
| H | -2.093847 | 4.551321  | 2.219748  | H | 0.347797  | 7.850019  | 8.421142  |
| C | -0.228584 | 4.112045  | -6.558535 | H | 0.622693  | 6.289774  | 7.617831  |
| H | -0.924846 | 4.304852  | -7.362192 | C | 3.007901  | -2.797848 | 6.591324  |
| C | 0.419256  | -6.188575 | 4.392498  | H | 2.694814  | -3.429538 | 7.409707  |
| H | 0.389229  | -6.656671 | 5.365440  | N | -3.107940 | 7.931657  | 5.369364  |
| C | 3.653315  | -2.176432 | -4.707870 | C | -2.304502 | 9.166175  | 5.666666  |
| H | 4.012398  | -2.229786 | -3.690593 | H | -2.981882 | 10.000884 | 5.885407  |
| C | -2.633615 | -4.144892 | -0.016195 | H | -1.741481 | 9.422863  | 4.764851  |
| H | -3.565199 | -3.590214 | -0.003947 | C | 10.500803 | 4.092537  | -2.460280 |
| N | 1.493344  | -5.482322 | -4.036460 | H | 9.672128  | 3.844563  | -3.123117 |
| C | -4.132111 | -4.017756 | -2.577663 | H | 11.423173 | 4.123828  | -3.052681 |



|   |           |           |           |   |           |           |           |
|---|-----------|-----------|-----------|---|-----------|-----------|-----------|
| H | 10.356614 | 5.072397  | -1.999069 | H | 5.529530  | -5.684529 | -8.643791 |
| N | -8.138774 | -1.981247 | 5.417884  | C | -1.440411 | 9.023768  | -6.622843 |
| C | -5.846875 | -5.152639 | 6.214630  | H | -0.770501 | 9.870909  | -6.810768 |
| H | -5.437286 | -4.446524 | 6.939823  | H | -2.006475 | 8.856196  | -7.541566 |
| H | -5.077406 | -5.466825 | 5.508848  | C | -4.168914 | 7.857736  | -6.258694 |
| H | -6.222153 | -6.031359 | 6.752412  | H | -3.694289 | 7.584513  | -7.201370 |
| C | -4.117096 | 7.705139  | 6.448247  | H | -4.735617 | 8.785239  | -6.402137 |
| H | -4.809392 | 6.924919  | 6.135681  | H | -4.868333 | 7.077613  | -5.962386 |
| H | -4.692311 | 8.623812  | 6.613148  | C | 10.783872 | 4.541301  | 1.832837  |
| H | -3.637771 | 7.416191  | 7.383885  | H | 10.825255 | 5.219551  | 0.980037  |
| C | -1.394797 | 8.884406  | 6.829764  | H | 11.718694 | 4.627741  | 2.399450  |
| H | -1.956355 | 8.692582  | 7.746598  | H | 9.962418  | 4.822979  | 2.490390  |
| H | -0.730300 | 9.732105  | 7.033668  | C | 6.190979  | -4.508483 | 6.148614  |
| C | 2.582611  | -8.435952 | 5.387761  | H | 6.452390  | -4.462567 | 5.089686  |
| H | 2.179544  | -8.116726 | 6.351889  | H | 7.097440  | -4.703361 | 6.733205  |
| H | 2.867129  | -9.492021 | 5.465369  | H | 5.756079  | -3.565728 | 6.479204  |
| H | 1.837276  | -8.338476 | 4.599200  | C | -2.343216 | 9.286354  | -5.450077 |
| C | 2.452845  | -8.311384 | -5.626545 | H | -3.014791 | 10.131095 | -5.647148 |
| H | 1.716425  | -8.225673 | -4.828207 | H | -1.774653 | 9.518259  | -4.544983 |
| H | 2.717850  | -9.369348 | -5.739988 | C | 11.917773 | 3.295323  | -0.659038 |
| H | 2.046504  | -7.955154 | -6.576174 | H | 12.758934 | 2.905339  | -1.244785 |
| C | -7.781088 | -1.143020 | 6.599204  | H | 12.062323 | 4.374653  | -0.571701 |
| H | -7.239079 | -1.730797 | 7.340923  | C | 5.906802  | -6.911332 | 6.046291  |
| H | -8.696331 | -0.753600 | 7.059496  | H | 6.409538  | -6.786899 | 5.083213  |
| H | -7.164819 | -0.305400 | 6.267386  | H | 6.677755  | -7.117149 | 6.798948  |
| C | 0.631068  | 8.062412  | 5.724244  | C | 10.672332 | 1.709091  | -2.057733 |
| H | 0.327982  | 8.589634  | 4.818179  | H | 9.716233  | 1.526085  | -2.551536 |
| H | 1.199510  | 7.168280  | 5.464224  | H | 10.867109 | 0.931324  | -1.317809 |
| H | 1.261659  | 8.725941  | 6.326290  | H | 11.471660 | 1.692202  | -2.807445 |
| C | 11.831198 | 2.632920  | 0.687057  | C | 10.371051 | 2.274089  | 2.588575  |
| H | 12.714176 | 2.857116  | 1.298249  | H | 10.199074 | 1.242062  | 2.277107  |
| H | 11.754739 | 1.545565  | 0.601491  | H | 9.518265  | 2.653197  | 3.151955  |
| C | -2.182027 | -3.522657 | 3.548027  | H | 11.260627 | 2.308909  | 3.228491  |
| H | -1.118621 | -3.416030 | 3.691130  | C | -3.817884 | 8.138235  | 4.081236  |
| C | 4.804553  | -5.600024 | 7.810730  | H | -3.087538 | 8.273464  | 3.281276  |
| H | 4.014885  | -6.328059 | 7.998999  | H | -4.441769 | 9.036794  | 4.151617  |
| H | 4.457218  | -4.601733 | 8.073038  | H | -4.459205 | 7.282005  | 3.871931  |
| H | 5.666416  | -5.840912 | 8.443797  | C | -3.860643 | 8.237135  | -3.883194 |
| C | 4.880859  | -8.009624 | 6.006427  | H | -3.127324 | 8.350187  | -3.082533 |
| H | 4.433198  | -8.178903 | 6.988233  | H | -4.508529 | 7.382270  | -3.689369 |
| H | 5.325542  | -8.960442 | 5.689688  | H | -4.477571 | 9.141762  | -3.933557 |
| C | 4.679853  | -5.447999 | -7.992819 | C | -8.679883 | -2.872252 | -6.426570 |
| H | 4.343057  | -4.438669 | -8.225209 | H | -9.731794 | -2.666559 | -6.659463 |
| H | 3.877729  | -6.160463 | -8.188063 | H | -8.112052 | -2.741568 | -7.351049 |

|   |            |           |           |   |           |           |           |
|---|------------|-----------|-----------|---|-----------|-----------|-----------|
| C | 4.198215   | -7.945413 | 3.653799  | C | -6.195068 | -4.700367 | -6.585033 |
| H | 5.132914   | -7.437816 | 3.410055  | H | -5.163664 | -4.796911 | -6.240765 |
| H | 3.410946   | -7.624767 | 2.968443  | H | -6.267094 | -3.897464 | -7.319539 |
| H | 4.344652   | -9.026650 | 3.551558  | H | -6.505040 | -5.639278 | -7.057950 |
| C | -0.178490  | 7.219076  | -7.644144 | C | -8.505047 | -4.252975 | -5.852202 |
| H | -1.041497  | 6.834542  | -8.192541 | H | -8.753662 | -5.026452 | -6.589338 |
| H | 0.553965   | 6.430869  | -7.474102 | H | -9.145863 | -4.415760 | -4.981848 |
| H | 0.288184   | 8.009631  | -8.243671 | C | -7.446615 | -5.447051 | 4.411770  |
| C | -6.995984  | -5.561962 | -4.462370 | H | -8.300400 | -5.019795 | 3.884373  |
| H | -5.951437  | -5.753832 | -4.214667 | H | -7.750940 | -6.396660 | 4.866844  |
| H | -7.418911  | -6.457544 | -4.933077 | H | -6.631505 | -5.636100 | 3.710611  |
| H | -7.573309  | -5.333313 | -3.564258 | C | 6.101370  | -4.415531 | -6.322465 |
| C | -9.199504  | -1.624803 | -4.367170 | H | 5.672204  | -3.459686 | -6.621480 |
| H | -9.446978  | -2.557445 | -3.858819 | H | 6.997233  | -4.604541 | -6.925073 |
| H | -10.111254 | -1.216219 | -4.817917 | H | 6.378236  | -4.400567 | -5.266594 |
| H | -8.805142  | -0.902161 | -3.650329 | C | -8.916958 | -1.157734 | 4.456377  |
| C | 4.093404   | -7.903719 | -3.894199 | H | -9.139800 | -1.744720 | 3.563097  |
| H | 3.318395   | -7.591918 | -3.191031 | H | -8.344399 | -0.265397 | 4.201287  |
| H | 5.038987   | -7.419682 | -3.644423 | H | -9.862610 | -0.852966 | 4.920290  |
| H | 4.222374   | -8.989917 | -3.827767 | C | 4.752692  | -7.904471 | -6.254276 |
| C | -7.914532  | -0.579877 | -6.140964 | H | 5.190302  | -8.867934 | -5.967143 |
| H | -7.116944  | -0.722859 | -6.872972 | H | 4.291787  | -8.044208 | -7.234490 |
| H | -7.638534  | 0.187306  | -5.416948 | C | 5.790700  | -6.817132 | -6.278383 |
| H | -8.822452  | -0.265321 | -6.669065 | H | 6.550050  | -7.011294 | -7.045736 |
| C | -8.078597  | -4.206848 | 6.442356  | H | 6.306500  | -6.724140 | -5.318543 |
| H | -8.631690  | -5.126496 | 6.668882  | C | -8.977064 | -3.160229 | 5.839572  |
| H | -7.624542  | -3.864171 | 7.375254  | H | -9.740708 | -2.828883 | 6.554054  |
| C | 0.584028   | 8.164653  | -5.544949 | H | -9.498095 | -3.533778 | 4.954435  |
| H | 1.147167   | 7.261497  | -5.305259 |   |           |           |           |
| H | 0.288447   | 8.675983  | -4.627352 |   |           |           |           |
| H | 1.216767   | 8.835540  | -6.136534 |   |           |           |           |

| Cartesian coordinates of Fe <sub>2</sub> Zn <sub>2</sub> (RuL <sub>2</sub> ) <sub>2</sub> |            |           |            |
|-------------------------------------------------------------------------------------------|------------|-----------|------------|
| N                                                                                         | -1.873693  | 0.053628  | -8.317410  |
| C                                                                                         | -2.611013  | -0.784257 | -9.047538  |
| C                                                                                         | -2.057556  | -1.840217 | -9.765608  |
| C                                                                                         | -0.681479  | -2.027598 | -9.717344  |
| C                                                                                         | 0.094771   | -1.160013 | -8.953209  |
| C                                                                                         | -0.532901  | -0.127414 | -8.266741  |
| C                                                                                         | 0.197042   | 0.887389  | -7.461509  |
| C                                                                                         | 1.475543   | 0.754008  | -6.929158  |
| C                                                                                         | 1.989918   | 1.780700  | -6.120271  |
| C                                                                                         | 1.198432   | 2.922832  | -5.910112  |
| C                                                                                         | -0.077423  | 2.980430  | -6.459651  |
| N                                                                                         | -0.542514  | 1.974729  | -7.210255  |
| C                                                                                         | -1.094420  | 4.036791  | -6.211295  |
| C                                                                                         | -0.783538  | 5.304940  | -5.736771  |
| C                                                                                         | -1.812520  | 6.226039  | -5.554147  |
| C                                                                                         | -3.117242  | 5.847968  | -5.846333  |
| C                                                                                         | -3.347081  | 4.559054  | -6.319257  |
| N                                                                                         | -2.366635  | 3.672879  | -6.501115  |
| C                                                                                         | 3.293305   | 1.654215  | -5.430706  |
| C                                                                                         | 4.139206   | 2.765066  | -5.340138  |
| C                                                                                         | 5.324748   | 2.675145  | -4.620888  |
| C                                                                                         | 5.653261   | 1.494559  | -3.963153  |
| C                                                                                         | 4.820491   | 0.370296  | -4.037442  |
| C                                                                                         | 3.649243   | 0.456776  | -4.796443  |
| C                                                                                         | 5.178671   | -0.864585 | -3.291126  |
| C                                                                                         | 5.561658   | -0.783574 | -1.947180  |
| C                                                                                         | 5.937690   | -1.919937 | -1.242865  |
| C                                                                                         | 5.971145   | -3.176702 | -1.859988  |
| C                                                                                         | 5.580723   | -3.253432 | -3.203851  |
| C                                                                                         | 5.179348   | -2.120770 | -3.903910  |
| H                                                                                         | -3.679821  | -0.588861 | -9.063236  |
| H                                                                                         | -2.694668  | -2.483131 | -10.361051 |
| H                                                                                         | -0.211538  | -2.826594 | -10.280713 |
| H                                                                                         | 1.173666   | -1.262534 | -8.922336  |
| H                                                                                         | 2.068110   | -0.136297 | -7.110822  |
| H                                                                                         | 1.557355   | 3.708469  | -5.254377  |
| H                                                                                         | 0.246172   | 5.579962  | -5.537824  |
| H                                                                                         | -1.593694  | 7.227548  | -5.199300  |
| H                                                                                         | -3.944310  | 6.537202  | -5.724140  |
| H                                                                                         | -4.348735  | 4.220671  | -6.570808  |
| H                                                                                         | 3.887250   | 3.685514  | -5.858717  |
| H                                                                                         | 5.995537   | 3.526128  | -4.576104  |
| H                                                                                         | 6.578779   | 1.429047  | -3.399331  |
| H                                                                                         | 2.979041   | -0.399460 | -4.830902  |
| H                                                                                         | 5.548452   | 0.179997  | -1.445525  |
| H                                                                                         | 6.203463   | -1.829272 | -0.194179  |
| H                                                                                         | 5.642382   | -4.202916 | -3.726243  |
| H                                                                                         | 4.923192   | -2.202686 | -4.956715  |
| N                                                                                         | -2.675732  | 0.859469  | -5.510109  |
| C                                                                                         | -1.711360  | 0.572775  | -4.632679  |
| C                                                                                         | -1.965501  | -0.017593 | -3.399368  |
| C                                                                                         | -3.279754  | -0.320665 | -3.068587  |
| C                                                                                         | -4.290089  | -0.027029 | -3.977499  |
| C                                                                                         | -3.957682  | 0.564540  | -5.192034  |
| C                                                                                         | -4.967510  | 0.930912  | -6.219814  |
| C                                                                                         | -6.338656  | 0.750022  | -6.110726  |
| C                                                                                         | -7.179391  | 1.187861  | -7.146378  |
| C                                                                                         | -6.587194  | 1.785826  | -8.271696  |
| C                                                                                         | -5.202766  | 1.937725  | -8.317838  |
| N                                                                                         | -4.438704  | 1.510745  | -7.303718  |
| C                                                                                         | -4.407600  | 2.567101  | -9.409546  |
| C                                                                                         | -4.966167  | 3.073686  | -10.576439 |
| C                                                                                         | -4.130777  | 3.654395  | -11.529374 |
| C                                                                                         | -2.764360  | 3.710428  | -11.286517 |
| C                                                                                         | -2.278321  | 3.179105  | -10.094239 |
| N                                                                                         | -3.071866  | 2.621496  | -9.178112  |
| C                                                                                         | -8.646285  | 1.065895  | -7.001099  |
| C                                                                                         | -9.475689  | 2.099499  | -7.448169  |
| C                                                                                         | -10.845120 | 2.026676  | -7.222713  |
| C                                                                                         | -11.389540 | 0.933211  | -6.560136  |
| C                                                                                         | -10.586150 | -0.133379 | -6.128761  |
| C                                                                                         | -9.209540  | -0.045954 | -6.360718  |
| C                                                                                         | -11.189772 | -1.306584 | -5.441068  |
| C                                                                                         | -12.519404 | -1.673351 | -5.687090  |
| C                                                                                         | -13.102763 | -2.746536 | -5.025565  |
| C                                                                                         | -12.369748 | -3.514228 | -4.114524  |
| C                                                                                         | -11.036103 | -3.164313 | -3.880132  |
| C                                                                                         | -10.462535 | -2.071462 | -4.520375  |
| H                                                                                         | -0.697079  | 0.829380  | -4.925624  |
| H                                                                                         | -1.146763  | -0.224019 | -2.720646  |
| H                                                                                         | -3.519450  | -0.775652 | -2.113596  |
| H                                                                                         | -5.323197  | -0.249709 | -3.739858  |
| H                                                                                         | -6.779832  | 0.320096  | -5.219563  |
| H                                                                                         | -7.212058  | 2.114667  | -9.094512  |
| H                                                                                         | -6.035122  | 3.020245  | -10.747599 |
| H                                                                                         | -4.545664  | 4.056690  | -12.447423 |

|   |            |            |            |   |            |            |           |
|---|------------|------------|------------|---|------------|------------|-----------|
| H | -2.081133  | 4.154153   | -12.001123 | N | -3.526214  | -16.272577 | -3.552929 |
| H | -1.218275  | 3.197872   | -9.857755  | C | -9.188334  | -14.039127 | -4.350284 |
| H | -9.052353  | 2.979564   | -7.922743  | C | -10.077403 | -15.094110 | -4.115470 |
| H | -11.489133 | 2.838169   | -7.543279  | C | -11.387390 | -14.825156 | -3.738588 |
| H | -12.454778 | 0.918752   | -6.356497  | C | -11.808032 | -13.510671 | -3.568929 |
| H | -8.571158  | -0.879448  | -6.079967  | C | -10.936898 | -12.437551 | -3.798676 |
| H | -13.103206 | -1.136366  | -6.427524  | C | -9.629714  | -12.716622 | -4.208704 |
| H | -14.131070 | -3.017864  | -5.245083  | C | -11.410769 | -11.045479 | -3.580805 |
| H | -10.456168 | -3.737381  | -3.162091  | C | -12.123572 | -10.720466 | -2.420751 |
| H | -9.442054  | -1.792718  | -4.273213  | C | -12.615275 | -9.437196  | -2.221029 |
| C | -12.996733 | -4.685706  | -3.443922  | C | -12.434732 | -8.434480  | -3.182450 |
| C | -12.407353 | -5.948154  | -3.544201  | C | -11.712549 | -8.761339  | -4.337948 |
| C | -14.201665 | -4.547670  | -2.749022  | C | -11.200089 | -10.040120 | -4.529469 |
| C | -13.024424 | -7.080241  | -3.001092  | H | -1.525440  | -12.699061 | -6.960605 |
| H | -11.465530 | -6.047096  | -4.077196  | H | -2.210799  | -11.280685 | -8.897435 |
| C | -14.823333 | -5.656134  | -2.164254  | H | -4.657525  | -11.025312 | -9.389404 |
| H | -14.668708 | -3.568748  | -2.677472  | H | -6.301272  | -12.200097 | -7.934173 |
| C | -14.231889 | -6.914854  | -2.313112  | H | -7.549781  | -12.767076 | -6.139351 |
| H | -14.733630 | -7.782886  | -1.895070  | H | -7.621969  | -15.933113 | -3.236091 |
| C | 6.451281   | -4.382517  | -1.131705  | H | -6.434742  | -17.777690 | -2.738243 |
| C | 5.980425   | -5.657465  | -1.463941  | H | -4.859043  | -19.316468 | -1.579655 |
| C | 7.432064   | -4.272774  | -0.138990  | H | -2.397484  | -18.862262 | -1.731170 |
| C | 6.512032   | -6.802970  | -0.867636  | H | -1.628406  | -16.876661 | -3.035592 |
| H | 5.206673   | -5.771593  | -2.218032  | H | -9.755217  | -16.121069 | -4.260991 |
| H | 7.849105   | -3.297996  | 0.097267   | H | -12.084844 | -15.641117 | -3.584172 |
| C | 7.503216   | -6.666605  | 0.108866   | H | -12.833540 | -13.304509 | -3.278123 |
| H | 7.897402   | -7.555687  | 0.594064   | H | -8.934963  | -11.891828 | -4.351298 |
| N | -3.450938  | -13.177583 | -6.416647  | H | -12.278822 | -11.479420 | -1.659318 |
| C | -2.573466  | -12.547425 | -7.202306  | H | -13.139548 | -9.208594  | -1.298406 |
| C | -2.962075  | -11.756073 | -8.278122  | H | -11.594097 | -8.020796  | -5.122691 |
| C | -4.318183  | -11.615865 | -8.545331  | H | -10.683262 | -10.278014 | -5.455136 |
| C | -5.238932  | -12.265365 | -7.728426  | N | -3.192783  | -13.192586 | -3.274336 |
| C | -4.779641  | -13.042251 | -6.670848  | C | -4.300152  | -12.700784 | -2.710576 |
| C | -5.693650  | -13.810142 | -5.782460  | C | -4.268400  | -11.800911 | -1.652216 |
| C | -7.049656  | -13.561232 | -5.595830  | C | -3.032418  | -11.398020 | -1.163342 |
| C | -7.772403  | -14.329683 | -4.669268  | C | -1.876660  | -11.903377 | -1.747387 |
| C | -7.095518  | -15.355114 | -3.987513  | C | -1.978976  | -12.803315 | -2.804563 |
| C | -5.736437  | -15.550922 | -4.208418  | C | -0.788828  | -13.401590 | -3.467745 |
| N | -5.075555  | -14.776179 | -5.083402  | C | 0.532550   | -13.137943 | -3.135660 |
| C | -4.863613  | -16.506902 | -3.473539  | C | 1.568803   | -13.797268 | -3.814259 |
| C | -5.367198  | -17.591700 | -2.765478  | C | 1.223007   | -14.706376 | -4.826614 |
| C | -4.484285  | -18.456232 | -2.123982  | C | -0.120407  | -14.934419 | -5.121989 |
| C | -3.119810  | -18.209378 | -2.206748  | N | -1.077881  | -14.281900 | -4.441526 |
| C | -2.685187  | -17.105396 | -2.933292  | C | -0.655781  | -15.868639 | -6.153548 |

|   |            |            |           |   |            |           |           |
|---|------------|------------|-----------|---|------------|-----------|-----------|
| C | 0.164178   | -16.641631 | -6.968079 | H | -19.167525 | -6.976115 | -1.158824 |
| C | -0.410784  | -17.498382 | -7.904080 | C | -19.925877 | -4.996762 | 0.518942  |
| C | -1.794599  | -17.559420 | -8.001004 | C | -21.064000 | -5.136135 | -0.287718 |
| C | -2.556840  | -16.757521 | -7.155964 | C | -20.100315 | -4.657979 | 1.865781  |
| N | -2.012892  | -15.932932 | -6.256187 | C | -22.338981 | -4.937299 | 0.226710  |
| C | 2.974315   | -13.561346 | -3.414136 | H | -20.940538 | -5.379698 | -1.338320 |
| C | 3.873532   | -14.631319 | -3.370435 | C | -21.383477 | -4.450430 | 2.392297  |
| C | 5.166854   | -14.422522 | -2.906134 | H | -19.225430 | -4.544844 | 2.502600  |
| C | 5.567464   | -13.158496 | -2.489882 | H | -23.206847 | -5.052085 | -0.413528 |
| C | 4.697290   | -12.059828 | -2.553163 | C | -21.606581 | -4.127905 | 3.821758  |
| C | 3.398022   | -12.284958 | -3.020760 | C | -22.604042 | -3.215557 | 4.197400  |
| C | 5.150830   | -10.707870 | -2.126416 | C | -20.883147 | -4.760986 | 4.842609  |
| C | 6.505143   | -10.353808 | -2.188543 | C | -22.857551 | -2.985289 | 5.546313  |
| C | 6.942360   | -9.105617  | -1.762227 | H | -23.159006 | -2.695627 | 3.425958  |
| C | 6.037720   | -8.150348  | -1.287831 | C | -21.195272 | -4.489241 | 6.171893  |
| C | 4.682183   | -8.491647  | -1.242143 | H | -20.124333 | -5.488022 | 4.578226  |
| C | 4.250191   | -9.752217  | -1.639169 | N | -22.157065 | -3.617511 | 6.495822  |
| H | -5.243593  | -13.047849 | -3.123300 | C | -23.913866 | -2.059594 | 6.058782  |
| H | -5.195325  | -11.436264 | -1.226190 | C | -24.783465 | -1.366917 | 5.221703  |
| H | -2.964394  | -10.702671 | -0.333947 | C | -25.756559 | -0.546011 | 5.786372  |
| H | -0.904330  | -11.604544 | -1.375858 | H | -24.719367 | -1.464368 | 4.144931  |
| H | 0.783788   | -12.460355 | -2.328700 | H | -26.446542 | -0.001510 | 5.150320  |
| H | 2.008356   | -15.212972 | -5.376092 | C | -20.547332 | -5.158356 | 7.340976  |
| H | 1.242450   | -16.582494 | -6.878010 | C | -19.599209 | -6.169354 | 7.204192  |
| H | 0.216962   | -18.108909 | -8.544178 | C | -19.076679 | -6.764096 | 8.348044  |
| H | -2.283660  | -18.213661 | -8.713285 | H | -19.280135 | -6.504526 | 6.225225  |
| H | -3.641577  | -16.770260 | -7.192477 | C | -20.457085 | -5.318487 | 9.647871  |
| H | 3.553945   | -15.630904 | -3.649227 | H | -18.345361 | -7.560335 | 8.260255  |
| H | 5.859809   | -15.254520 | -2.845080 | H | -20.834642 | -4.949198 | 10.598275 |
| H | 6.567108   | -13.029002 | -2.089599 | C | -19.509713 | -6.334724 | 9.596713  |
| H | 2.717717   | -11.443679 | -3.125008 | H | -19.133649 | -6.777292 | 10.511175 |
| H | 7.229373   | -11.048126 | -2.601701 | N | -23.992579 | -1.950401 | 7.399641  |
| H | 7.996273   | -8.852967  | -1.831242 | N | -20.961918 | -4.746300 | 8.553354  |
| H | 3.967002   | -7.770131  | -0.857195 | C | 7.955808   | -5.401616 | 0.500097  |
| H | 3.198654   | -10.004465 | -1.536886 | C | 8.997095   | -5.252457 | 1.553094  |
| C | -16.108602 | -5.506909  | -1.427896 | C | 10.106677  | -6.104843 | 1.594281  |
| C | -16.316249 | -4.452354  | -0.531017 | C | 8.907771   | -4.242358 | 2.518866  |
| C | -17.153358 | -6.416848  | -1.628654 | C | 11.106506  | -5.928847 | 2.542429  |
| C | -17.531701 | -4.302541  | 0.130792  | H | 10.208937  | -6.889987 | 0.851190  |
| H | -15.516053 | -3.740036  | -0.351130 | C | 9.904074   | -4.071055 | 3.475769  |
| C | -18.370154 | -6.261497  | -0.977169 | H | 8.046269   | -3.580694 | 2.518048  |
| H | -17.024164 | -7.234799  | -2.331224 | H | 11.964300  | -6.594847 | 2.542803  |
| C | -18.583997 | -5.196415  | -0.093220 | H | 9.827960   | -3.257088 | 4.191602  |
| H | -17.679692 | -3.457523  | 0.797823  | C | 11.029859  | -4.900870 | 3.490867  |

|   |            |           |           |   |           |            |           |
|---|------------|-----------|-----------|---|-----------|------------|-----------|
| C | 12.169792  | -4.666941 | 4.419428  | C | -4.581421 | -5.528275  | 31.252960 |
| C | 12.001376  | -4.400029 | 5.782932  | C | -5.097459 | -6.547085  | 30.460301 |
| C | 13.472615  | -4.698985 | 3.901466  | C | -4.239836 | -7.592379  | 29.839006 |
| C | 13.109879  | -4.158035 | 6.607960  | C | -2.877620 | -7.482754  | 29.578376 |
| H | 10.996079  | -4.370161 | 6.198061  | C | -2.214521 | -8.528801  | 28.915883 |
| C | 14.575848  | -4.463836 | 4.711635  | C | -2.953924 | -9.675417  | 28.580000 |
| H | 13.615302  | -4.887651 | 2.842082  | C | -4.316236 | -9.723125  | 28.855911 |
| C | 14.398519  | -4.186410 | 6.060859  | N | -4.919643 | -8.687220  | 29.461080 |
| H | 15.575060  | -4.496436 | 4.291290  | C | -5.251349 | -10.802428 | 28.436271 |
| H | 15.265107  | -4.035174 | 6.697451  | C | -4.821216 | -12.078258 | 28.090801 |
| C | 12.970543  | -3.919134 | 8.063679  | C | -5.761171 | -13.038925 | 27.727369 |
| C | 13.788945  | -2.983639 | 8.714854  | C | -7.106949 | -12.694747 | 27.715220 |
| C | 12.071655  | -4.656703 | 8.848127  | C | -7.466976 | -11.399683 | 28.074173 |
| C | 13.702036  | -2.831447 | 10.095423 | N | -6.571141 | -10.474136 | 28.428045 |
| H | 14.474065  | -2.384703 | 8.127123  | C | -0.798591 | -8.413790  | 28.498960 |
| C | 12.044165  | -4.459328 | 10.225720 | C | 0.040898  | -9.531624  | 28.563906 |
| H | 11.447099  | -5.403886 | 8.372924  | C | 1.345037  | -9.446727  | 28.091899 |
| N | 12.841555  | -3.561433 | 10.815680 | C | 1.808995  | -8.261385  | 27.531962 |
| C | 11.187658  | -5.239162 | 11.170678 | C | 0.988297  | -7.128148  | 27.457469 |
| C | 10.375501  | -6.294069 | 10.761843 | C | -0.312438 | -7.213602  | 27.963006 |
| C | 9.642104   | -6.990895 | 11.716912 | C | 1.505867  | -5.882251  | 26.833776 |
| H | 10.324917  | -6.585871 | 9.720206  | C | 2.194206  | -5.936591  | 25.616215 |
| C | 10.566502  | -5.551697 | 13.378097 | C | 2.727921  | -4.788198  | 25.045750 |
| H | 9.014987   | -7.824346 | 11.419320 | C | 2.615252  | -3.544782  | 25.680702 |
| H | 10.681004  | -5.221813 | 14.407867 | C | 1.917592  | -3.493785  | 26.894874 |
| C | 14.544258  | -1.888793 | 10.893792 | C | 1.362546  | -4.638489  | 27.456234 |
| C | 15.539710  | -1.098284 | 10.327171 | H | -8.321402 | -5.938241  | 30.611462 |
| C | 15.025447  | -1.068294 | 13.004646 | H | -7.532808 | -4.066334  | 32.063654 |
| C | 16.296022  | -0.268222 | 11.150945 | H | -5.070214 | -3.831744  | 32.484471 |
| H | 15.738258  | -1.127057 | 9.262919  | H | -3.515001 | -5.471067  | 31.439351 |
| H | 14.786961  | -1.092498 | 14.064918 | H | -2.327780 | -6.590018  | 29.855582 |
| H | 17.079871  | 0.351406  | 10.728161 | H | -2.473062 | -10.478539 | 28.032636 |
| C | 9.734898   | -6.616964 | 13.052016 | H | -3.767133 | -12.328100 | 28.131763 |
| H | 9.188463   | -7.140257 | 13.827278 | H | -5.444863 | -14.043763 | 27.469172 |
| C | 16.038560  | -0.250006 | 12.516395 | H | -7.871767 | -13.413650 | 27.445852 |
| H | 16.609097  | 0.377292  | 13.190953 | H | -8.506458 | -11.085188 | 28.089138 |
| N | 14.297096  | -1.865161 | 12.218158 | H | -0.313556 | -10.455020 | 29.012616 |
| N | 11.272827  | -4.881882 | 12.465512 | H | 2.004237  | -10.304638 | 28.166874 |
| C | -22.501630 | -4.588788 | 1.561230  | H | 2.830044  | -8.198435  | 27.168475 |
| H | -23.501004 | -4.465003 | 1.967147  | H | -0.969176 | -6.350945  | 27.873670 |
| N | -6.434313  | -6.670401 | 30.245821 | H | 2.299318  | -6.889232  | 25.104751 |
| C | -7.264135  | -5.787711 | 30.808932 | H | 3.234670  | -4.858409  | 24.088159 |
| C | -6.817898  | -4.745605 | 31.614863 | H | 1.854881  | -2.555536  | 27.437052 |
| C | -5.453382  | -4.617314 | 31.842246 | H | 0.867969  | -4.576718  | 28.421767 |

|   |            |            |           |   |            |           |           |
|---|------------|------------|-----------|---|------------|-----------|-----------|
| N | -6.715275  | -7.606558  | 27.241687 | H | -17.018008 | -5.333611 | 25.735997 |
| C | -5.582875  | -7.363303  | 26.574562 | H | -17.690076 | -3.501144 | 24.255697 |
| C | -5.566292  | -6.822613  | 25.294769 | H | -13.622741 | -2.997045 | 23.006174 |
| C | -6.778852  | -6.523870  | 24.687022 | H | -12.950842 | -4.894726 | 24.419441 |
| C | -7.960187  | -6.772750  | 25.376081 | C | -16.131961 | -1.986096 | 22.650861 |
| C | -7.906423  | -7.317839  | 26.655865 | C | -15.539953 | -0.729033 | 22.789266 |
| C | -9.127077  | -7.631147  | 27.447273 | C | -17.148245 | -2.159714 | 21.707584 |
| C | -10.432741 | -7.424587  | 27.025267 | C | -15.976930 | 0.363326  | 22.031765 |
| C | -11.502550 | -7.800909  | 27.851675 | H | -14.747324 | -0.599200 | 23.520900 |
| C | -11.204713 | -8.370648  | 29.099707 | C | -17.575071 | -1.097534 | 20.902609 |
| C | -9.875395  | -8.556212  | 29.475889 | H | -17.586776 | -3.145352 | 21.577048 |
| N | -8.884761  | -8.185037  | 28.647836 | C | -16.989099 | 0.159959  | 21.085776 |
| C | -9.391069  | -9.158763  | 30.750908 | H | -17.379219 | 1.007724  | 20.529596 |
| C | -10.250987 | -9.604052  | 31.748323 | C | 3.255591   | -2.326733 | 25.114437 |
| C | -9.722660  | -10.167917 | 32.907451 | C | 2.712487   | -1.058325 | 25.347130 |
| C | -8.344299  | -10.271132 | 33.039118 | C | 4.450573   | -2.417782 | 24.391116 |
| C | -7.540136  | -9.803250  | 32.003758 | C | 3.370532   | 0.098267  | 24.923895 |
| N | -8.039289  | -9.261025  | 30.889173 | H | 1.776029   | -0.960656 | 25.889623 |
| C | -12.893546 | -7.644292  | 27.370180 | H | 4.915590   | -3.388322 | 24.243226 |
| C | -13.840236 | -8.635358  | 27.647987 | C | 4.572429   | -0.019253 | 24.220221 |
| C | -15.120221 | -8.531357  | 27.116322 | H | 5.071636   | 0.879260  | 23.866928 |
| C | -15.459751 | -7.449198  | 26.313287 | N | -7.609550  | 6.534013  | 27.586742 |
| C | -14.540217 | -6.425055  | 26.041811 | C | -6.971562  | 5.937538  | 28.594846 |
| C | -13.255866 | -6.542121  | 26.583923 | C | -7.632680  | 5.185581  | 29.561600 |
| C | -14.930031 | -5.269223  | 25.189865 | C | -9.012934  | 5.053098  | 29.471420 |
| C | -16.266390 | -4.854652  | 25.116963 | C | -9.685909  | 5.668785  | 28.419074 |
| C | -16.649427 | -3.810018  | 24.285670 | C | -8.954187  | 6.404119  | 27.494565 |
| C | -15.706562 | -3.118058  | 23.518353 | C | -9.569922  | 7.143659  | 26.360912 |
| C | -14.367312 | -3.510670  | 23.607902 | C | -10.822944 | 6.907511  | 25.805623 |
| C | -13.989452 | -4.576090  | 24.417919 | C | -11.222552 | 7.644342  | 24.678066 |
| H | -4.658980  | -7.616775  | 27.087672 | C | -10.346464 | 8.623015  | 24.178627 |
| H | -4.620897  | -6.650647  | 24.794486 | C | -9.103873  | 8.798336  | 24.778559 |
| H | -6.809930  | -6.107556  | 23.686089 | N | -8.747966  | 8.062116  | 25.838390 |
| H | -8.915514  | -6.553256  | 24.915559 | C | -8.010134  | 9.681007  | 24.292026 |
| H | -10.645803 | -7.015271  | 26.045115 | C | -8.210798  | 10.739483 | 23.414893 |
| H | -12.015299 | -8.651288  | 29.762658 | C | -7.117518  | 11.513887 | 23.033134 |
| H | -11.324464 | -9.516646  | 31.628552 | C | -5.860529  | 11.202434 | 23.536336 |
| H | -10.382443 | -10.521473 | 33.692553 | C | -5.741688  | 10.127507 | 24.412751 |
| H | -7.891138  | -10.705151 | 33.922691 | N | -6.784369  | 9.383331  | 24.785697 |
| H | -6.457637  | -9.861972  | 32.058402 | C | -12.495568 | 7.358429  | 23.978734 |
| H | -13.567619 | -9.508089  | 28.233650 | C | -13.253979 | 8.409522  | 23.451880 |
| H | -15.850173 | -9.310451  | 27.306811 | C | -14.414218 | 8.135229  | 22.737658 |
| H | -16.450112 | -7.410514  | 25.872512 | C | -14.807862 | 6.818809  | 22.523549 |
| H | -12.539099 | -5.739965  | 26.428974 | C | -14.064291 | 5.749503  | 23.039755 |

|   |            |           |           |   |            |           |           |
|---|------------|-----------|-----------|---|------------|-----------|-----------|
| C | -12.914886 | 6.036065  | 23.782747 | C | 0.155644   | 7.891482  | 26.786078 |
| C | -14.496088 | 4.351581  | 22.779193 | C | 1.527394   | 7.686442  | 26.694691 |
| C | -14.897669 | 3.963426  | 21.495589 | C | 2.031263   | 6.426746  | 26.392359 |
| C | -15.344749 | 2.672028  | 21.247388 | C | 1.181301   | 5.326142  | 26.205579 |
| C | -15.428031 | 1.724687  | 22.275620 | C | -0.196080  | 5.546221  | 26.308833 |
| C | -15.017719 | 2.115452  | 23.557309 | C | 1.732407   | 3.980476  | 25.887576 |
| C | -14.550251 | 3.401384  | 23.803352 | C | 3.030065   | 3.621149  | 26.275466 |
| H | -5.895242  | 6.082793  | 28.630522 | C | 3.560950   | 2.380562  | 25.944142 |
| H | -7.073983  | 4.733727  | 30.372559 | C | 2.803616   | 1.437584  | 25.241943 |
| H | -9.564631  | 4.494242  | 30.219672 | C | 1.500538   | 1.783744  | 24.870069 |
| H | -10.765646 | 5.608547  | 28.340753 | C | 0.982522   | 3.037216  | 25.173509 |
| H | -11.483309 | 6.151536  | 26.216302 | H | -8.511819  | 6.261281  | 24.038728 |
| H | -10.613635 | 9.175611  | 23.284698 | H | -7.981802  | 4.574535  | 22.291295 |
| H | -9.206218  | 10.974399 | 23.055271 | H | -5.608607  | 3.787266  | 22.062728 |
| H | -7.251043  | 12.353942 | 22.359900 | H | -3.886997  | 4.718456  | 23.592574 |
| H | -4.986177  | 11.783761 | 23.268929 | H | -2.503640  | 5.653703  | 24.951039 |
| H | -4.781230  | 9.850941  | 24.839607 | H | -2.219206  | 8.526995  | 28.127358 |
| H | -12.958512 | 9.439236  | 23.630800 | H | -3.444292  | 9.958217  | 29.310272 |
| H | -15.018336 | 8.950573  | 22.354887 | H | -4.975294  | 11.531625 | 30.476445 |
| H | -15.718611 | 6.609840  | 21.970751 | H | -7.395176  | 11.575584 | 29.823946 |
| H | -12.310049 | 5.211962  | 24.154705 | H | -8.173275  | 10.025224 | 28.023447 |
| H | -14.842018 | 4.678562  | 20.679713 | H | -0.230401  | 8.889831  | 26.968515 |
| H | -15.625482 | 2.392629  | 20.236514 | H | 2.208532   | 8.519054  | 26.832139 |
| H | -15.116445 | 1.420830  | 24.385551 | H | 3.102921   | 6.303770  | 26.278380 |
| H | -14.282778 | 3.690523  | 24.815996 | H | -0.875512  | 4.702835  | 26.222133 |
| N | -6.575641  | 6.401583  | 24.736456 | H | 3.629678   | 4.303769  | 26.868660 |
| C | -7.496999  | 5.893921  | 23.914388 | H | 4.565780   | 2.122933  | 26.265311 |
| C | -7.198167  | 4.949394  | 22.938561 | H | 0.903903   | 1.072569  | 24.305734 |
| C | -5.884030  | 4.517006  | 22.816593 | H | -0.010528  | 3.295321  | 24.817266 |
| C | -4.919121  | 5.037522  | 23.671782 | C | -18.657640 | -1.298988 | 19.901474 |
| C | -5.295253  | 5.980475  | 24.623252 | C | -18.622781 | -0.678421 | 18.646635 |
| C | -4.336154  | 6.607188  | 25.570188 | C | -19.754314 | -2.117321 | 20.197156 |
| C | -2.974881  | 6.350776  | 25.633115 | C | -19.653917 | -0.854188 | 17.727719 |
| C | -2.179128  | 7.047747  | 26.556731 | H | -17.774826 | -0.051664 | 18.385505 |
| C | -2.806655  | 7.985520  | 27.394296 | C | -20.783898 | -2.290798 | 19.282879 |
| C | -4.179309  | 8.199062  | 27.276650 | H | -19.819340 | -2.599055 | 21.167999 |
| N | -4.899620  | 7.510027  | 26.381731 | C | -20.759226 | -1.654484 | 18.035096 |
| C | -5.005559  | 9.166242  | 28.053453 | H | -19.616212 | -0.335031 | 16.773837 |
| C | -4.495043  | 9.993003  | 29.046481 | H | -21.621750 | -2.930993 | 19.541622 |
| C | -5.353925  | 10.874599 | 29.700675 | C | -21.919735 | -1.804668 | 17.115444 |
| C | -6.695673  | 10.902048 | 29.342787 | C | -23.213150 | -1.778508 | 17.657018 |
| C | -7.134105  | 10.040885 | 28.339622 | C | -21.779970 | -1.988855 | 15.734251 |
| N | -6.318306  | 9.194413  | 27.709573 | C | -24.334118 | -1.954096 | 16.856619 |
| C | -0.717297  | 6.819369  | 26.575715 | H | -23.337543 | -1.595993 | 18.719627 |



|   |            |           |           |    |            |            |           |
|---|------------|-----------|-----------|----|------------|------------|-----------|
| C | -22.906200 | -2.184277 | 14.921651 | C  | 11.315587  | -1.846227  | 21.956285 |
| H | -20.782836 | -2.042685 | 15.302349 | C  | 11.602726  | -2.341237  | 19.230701 |
| H | -25.325725 | -1.911178 | 17.293745 | H  | 9.448610   | -2.164175  | 19.140260 |
| C | -22.797423 | -2.409259 | 13.460506 | C  | 12.581321  | -2.049420  | 21.421390 |
| C | -23.614738 | -3.360597 | 12.831631 | H  | 11.203836  | -1.678809  | 23.022912 |
| C | -21.929158 | -1.658460 | 12.655096 | C  | 12.727617  | -2.302992  | 20.063834 |
| C | -23.554084 | -3.519238 | 11.450559 | H  | 13.454696  | -2.012923  | 22.063135 |
| H | -24.272701 | -3.970807 | 13.438406 | H  | 13.720913  | -2.429964  | 19.644277 |
| C | -21.930423 | -1.860182 | 11.277327 | C  | 11.811490  | -2.566744  | 17.780801 |
| H | -21.302113 | -0.903746 | 13.115251 | C  | 12.780450  | -3.479273  | 17.335763 |
| N | -22.722675 | -2.776767 | 10.709655 | C  | 11.103871  | -1.842467  | 16.810519 |
| C | -24.390153 | -4.485900 | 10.675536 | C  | 13.022099  | -3.621599  | 15.972709 |
| C | -25.383829 | -5.264623 | 11.261095 | H  | 13.324011  | -4.068510  | 18.064439 |
| C | -26.134467 | -6.120021 | 10.458364 | C  | 11.403434  | -2.029437  | 15.464038 |
| H | -25.587268 | -5.205156 | 12.323203 | H  | 10.367259  | -1.114289  | 17.129286 |
| C | -24.863453 | -5.363765 | 8.586529  | N  | 12.337344  | -2.904498  | 15.073733 |
| H | -26.917612 | -6.730344 | 10.895746 | C  | 10.771949  | -1.262039  | 14.347611 |
| H | -24.623696 | -5.365531 | 7.526282  | C  | 9.869576   | -0.222585  | 14.559289 |
| C | -21.112553 | -1.069222 | 10.308013 | C  | 9.362090   | 0.464717   | 13.461519 |
| C | -20.347246 | 0.031344  | 10.685355 | H  | 9.576689   | 0.063894   | 15.561675 |
| C | -19.651290 | 0.736568  | 9.708497  | C  | 10.667206  | -0.952488  | 12.056514 |
| H | -20.308437 | 0.352468  | 11.718872 | H  | 8.666463   | 1.284103   | 13.607293 |
| C | -20.519974 | -0.783501 | 8.089333  | H  | 11.020375  | -1.276296  | 11.080522 |
| H | -19.061008 | 1.604725  | 9.981037  | C  | 14.049121  | -4.539142  | 15.390291 |
| H | -20.626685 | -1.142927 | 7.068750  | C  | 14.901454  | -5.315767  | 16.170067 |
| C | -19.734762 | 0.325587  | 8.383601  | C  | 15.029741  | -5.326098  | 13.446244 |
| H | -19.216679 | 0.853450  | 7.592134  | C  | 15.847549  | -6.121331  | 15.541396 |
| C | -25.873400 | -6.173936 | 9.094555  | H  | 14.844857  | -5.294245  | 17.251388 |
| H | -26.439857 | -6.821255 | 8.435649  | H  | 15.047013  | -5.293967  | 12.359831 |
| N | -24.140301 | -4.542936 | 9.352809  | H  | 16.523584  | -6.729777  | 16.132751 |
| N | -21.189965 | -1.461792 | 9.022891  | C  | 9.764787   | 0.097392   | 12.183169 |
| C | 5.112115   | -1.276289 | 23.925696 | H  | 9.400456   | 0.613813   | 11.303285 |
| C | 6.384537   | -1.399872 | 23.163253 | C  | 15.917776  | -6.129389  | 14.153627 |
| C | 7.461977   | -0.545617 | 23.425499 | H  | 16.644110  | -6.737061  | 13.627102 |
| C | 6.548550   | -2.381572 | 22.178105 | N  | 14.119591  | -4.553648  | 14.044778 |
| C | 8.667735   | -0.688925 | 22.751213 | N  | 11.157107  | -1.613720  | 13.106856 |
| H | 7.367107   | 0.216817  | 24.192772 | C  | -24.184249 | -2.170045  | 15.493183 |
| C | 7.753313   | -2.520262 | 21.495190 | H  | -25.062969 | -2.283478  | 14.865315 |
| H | 5.720888   | -3.045666 | 21.945370 | Ru | -6.945488  | -8.491811  | 29.189787 |
| H | 9.491161   | -0.019660 | 22.982550 | Zn | -22.567975 | -3.176320  | 8.580949  |
| H | 7.866407   | -3.312033 | 20.759667 | Zn | 12.707851  | -3.228324  | 12.957600 |
| C | 8.838879   | -1.686363 | 21.782446 | Ru | -3.039463  | -14.629572 | -4.867079 |
| C | 10.170499  | -1.884979 | 21.147678 | Fe | -2.500097  | 1.792694   | -7.370405 |
| C | 10.328984  | -2.128901 | 19.778391 | Fe | -6.819263  | 7.866701   | 26.201910 |

|   |            |           |          |
|---|------------|-----------|----------|
| C | -25.834365 | -0.438740 | 7.169597 |
| H | -26.580114 | 0.185368  | 7.647632 |
| C | -24.927696 | -1.162436 | 7.936888 |
| H | -24.949666 | -1.115012 | 9.022599 |

| Cartesian coordinates of Pd <sub>4</sub> L <sub>8</sub> (BF <sub>4</sub> ) <sub>3</sub> |           |           |           |   |           |           |            |
|-----------------------------------------------------------------------------------------|-----------|-----------|-----------|---|-----------|-----------|------------|
|                                                                                         |           |           |           | C | -0.245850 | 1.726875  | -3.777108  |
|                                                                                         |           |           |           | H | -1.199523 | 2.015752  | -4.202922  |
|                                                                                         |           |           |           | C | -0.204905 | 1.097122  | -2.541793  |
|                                                                                         |           |           |           | H | -1.110899 | 0.879933  | -1.985053  |
|                                                                                         |           |           |           | N | 0.958008  | 0.727255  | -1.980417  |
|                                                                                         |           |           |           | C | 9.449375  | 2.576582  | -9.163185  |
|                                                                                         |           |           |           | H | 10.296065 | 2.034603  | -9.588307  |
|                                                                                         |           |           |           | H | 8.566009  | 2.101054  | -9.588567  |
|                                                                                         |           |           |           | C | 9.515582  | 4.061914  | -9.512530  |
|                                                                                         |           |           |           | H | 10.435459 | 4.480904  | -9.088074  |
|                                                                                         |           |           |           | H | 8.684911  | 4.581322  | -9.017675  |
|                                                                                         |           |           |           | C | 9.460013  | 4.315350  | -11.020209 |
|                                                                                         |           |           |           | H | 9.660255  | 5.377061  | -11.200822 |
|                                                                                         |           |           |           | H | 10.269152 | 3.764905  | -11.519450 |
|                                                                                         |           |           |           | C | 8.121116  | 3.951333  | -11.663584 |
|                                                                                         |           |           |           | H | 7.309675  | 4.455200  | -11.118017 |
|                                                                                         |           |           |           | H | 7.931022  | 2.871952  | -11.579049 |
|                                                                                         |           |           |           | C | 8.050171  | 4.341601  | -13.139396 |
|                                                                                         |           |           |           | H | 8.222198  | 5.420485  | -13.231270 |
|                                                                                         |           |           |           | H | 8.869524  | 3.851927  | -13.679599 |
|                                                                                         |           |           |           | C | 6.715351  | 3.974011  | -13.779814 |
|                                                                                         |           |           |           | H | 6.685014  | 4.266604  | -14.831244 |
|                                                                                         |           |           |           | H | 6.538587  | 2.895027  | -13.728075 |
|                                                                                         |           |           |           | H | 5.886043  | 4.474185  | -13.270325 |
|                                                                                         |           |           |           | N | 9.380114  | -3.981754 | 7.119213   |
|                                                                                         |           |           |           | O | 9.391505  | -2.179682 | 3.431962   |
|                                                                                         |           |           |           | C | 9.397810  | -2.725713 | 4.530660   |
|                                                                                         |           |           |           | C | 10.635116 | -3.015120 | 5.265708   |
|                                                                                         |           |           |           | C | 10.591853 | -3.655139 | 6.525159   |
|                                                                                         |           |           |           | C | 11.817121 | -3.954249 | 7.161451   |
|                                                                                         |           |           |           | H | 11.842127 | -4.492896 | 8.098937   |
|                                                                                         |           |           |           | C | 13.011981 | -3.593215 | 6.580256   |
|                                                                                         |           |           |           | H | 13.943681 | -3.836049 | 7.080336   |
|                                                                                         |           |           |           | C | 13.055170 | -2.923069 | 5.340762   |
|                                                                                         |           |           |           | C | 11.857646 | -2.650432 | 4.691694   |
|                                                                                         |           |           |           | H | 11.857392 | -2.146178 | 3.729298   |
|                                                                                         |           |           |           | C | 14.312269 | -2.557800 | 4.774330   |
|                                                                                         |           |           |           | C | 15.398581 | -2.258356 | 4.331539   |
|                                                                                         |           |           |           | C | 16.664157 | -1.919701 | 3.772161   |
|                                                                                         |           |           |           | C | 16.723937 | -1.387092 | 2.480405   |
|                                                                                         |           |           |           | H | 15.814155 | -1.216721 | 1.908286   |
|                                                                                         |           |           |           | C | 17.866784 | -2.119291 | 4.460440   |
|                                                                                         |           |           |           | H | 17.845582 | -2.527377 | 5.465820   |
|                                                                                         |           |           |           | C | 19.066838 | -1.790104 | 3.845524   |
| Pd                                                                                      | 0.997517  | -0.272584 | -0.154041 |   |           |           |            |
| Pd                                                                                      | 17.895704 | -0.342620 | -0.009167 |   |           |           |            |
| N                                                                                       | 9.432183  | 2.335191  | -7.713391 |   |           |           |            |
| O                                                                                       | 9.362682  | 1.549328  | -3.680145 |   |           |           |            |
| C                                                                                       | 9.388908  | 1.773953  | -4.886323 |   |           |           |            |
| C                                                                                       | 10.639848 | 1.876196  | -5.647832 |   |           |           |            |
| C                                                                                       | 10.628876 | 2.184746  | -7.026296 |   |           |           |            |
| C                                                                                       | 11.872413 | 2.338613  | -7.680031 |   |           |           |            |
| H                                                                                       | 11.923794 | 2.641211  | -8.717043 |   |           |           |            |
| C                                                                                       | 13.051190 | 2.132899  | -6.998285 |   |           |           |            |
| H                                                                                       | 13.996120 | 2.251891  | -7.517655 |   |           |           |            |
| C                                                                                       | 13.061277 | 1.777374  | -5.633423 |   |           |           |            |
| C                                                                                       | 11.846145 | 1.673338  | -4.971942 |   |           |           |            |
| H                                                                                       | 11.799084 | 1.424550  | -3.916021 |   |           |           |            |
| C                                                                                       | 14.301900 | 1.521306  | -4.976217 |   |           |           |            |
| C                                                                                       | 15.382328 | 1.343384  | -4.457980 |   |           |           |            |
| C                                                                                       | 16.648168 | 1.090909  | -3.852438 |   |           |           |            |
| C                                                                                       | 16.715745 | 0.632285  | -2.532505 |   |           |           |            |
| H                                                                                       | 15.817675 | 0.453882  | -1.944846 |   |           |           |            |
| C                                                                                       | 17.849664 | 1.278855  | -4.546528 |   |           |           |            |
| H                                                                                       | 17.824962 | 1.630230  | -5.572650 |   |           |           |            |
| C                                                                                       | 19.053602 | 1.012187  | -3.910651 |   |           |           |            |
| H                                                                                       | 19.999889 | 1.144601  | -4.421819 |   |           |           |            |
| C                                                                                       | 19.036693 | 0.565689  | -2.597117 |   |           |           |            |
| H                                                                                       | 19.943587 | 0.340862  | -2.042310 |   |           |           |            |
| N                                                                                       | 17.883892 | 0.386549  | -1.940868 |   |           |           |            |
| C                                                                                       | 8.163303  | 1.979691  | -5.672999 |   |           |           |            |
| C                                                                                       | 8.221074  | 2.290453  | -7.050266 |   |           |           |            |
| C                                                                                       | 7.002201  | 2.556434  | -7.722806 |   |           |           |            |
| H                                                                                       | 6.991185  | 2.866079  | -8.759512 |   |           |           |            |
| C                                                                                       | 5.800083  | 2.450596  | -7.063159 |   |           |           |            |
| H                                                                                       | 4.878322  | 2.653847  | -7.597677 |   |           |           |            |
| C                                                                                       | 5.741876  | 2.086024  | -5.699905 |   |           |           |            |
| C                                                                                       | 6.934422  | 1.874246  | -5.020204 |   |           |           |            |
| H                                                                                       | 6.950401  | 1.619953  | -3.964481 |   |           |           |            |
| C                                                                                       | 4.484763  | 1.930688  | -5.046465 |   |           |           |            |
| C                                                                                       | 3.411310  | 1.783599  | -4.504359 |   |           |           |            |
| C                                                                                       | 2.157720  | 1.584737  | -3.862774 |   |           |           |            |
| C                                                                                       | 2.114685  | 0.962055  | -2.608645 |   |           |           |            |
| H                                                                                       | 3.021218  | 0.649665  | -2.099217 |   |           |           |            |
| C                                                                                       | 0.944460  | 1.972159  | -4.448329 |   |           |           |            |
| H                                                                                       | 0.947219  | 2.457844  | -5.418195 |   |           |           |            |

|   |           |           |           |   |           |           |           |
|---|-----------|-----------|-----------|---|-----------|-----------|-----------|
| H | 20.017202 | -1.926948 | 4.348301  | N | 9.421634  | -8.023175 | -2.403214 |
| C | 19.045710 | -1.275086 | 2.557151  | O | 9.435298  | -3.948047 | -1.863244 |
| H | 19.958073 | -1.010561 | 2.028505  | C | 9.437192  | -5.166750 | -2.009387 |
| N | 17.888862 | -1.086508 | 1.907623  | C | 10.672404 | -5.959349 | -2.065319 |
| C | 8.157811  | -3.161138 | 5.188632  | C | 10.632187 | -7.352833 | -2.294676 |
| C | 8.184963  | -3.801356 | 6.446878  | C | 11.861179 | -8.039795 | -2.417293 |
| C | 6.957545  | -4.248226 | 6.994347  | H | 11.889551 | -9.093225 | -2.660161 |
| H | 6.927936  | -4.803128 | 7.922941  | C | 13.055125 | -7.371018 | -2.262465 |
| C | 5.771345  | -4.002105 | 6.342323  | H | 13.988589 | -7.914962 | -2.360766 |
| H | 4.840070  | -4.344189 | 6.781127  | C | 13.095029 | -5.988886 | -1.986181 |
| C | 5.741231  | -3.312968 | 5.110711  | C | 11.893525 | -5.298607 | -1.907220 |
| C | 6.944383  | -2.918364 | 4.540422  | H | 11.869554 | -4.229672 | -1.718611 |
| H | 6.972030  | -2.399841 | 3.586161  | C | 14.349102 | -5.335912 | -1.794272 |
| C | 4.495498  | -3.008928 | 4.488656  | C | 15.431777 | -4.818915 | -1.628344 |
| C | 3.429859  | -2.718183 | 3.992852  | C | 16.698005 | -4.200105 | -1.414074 |
| C | 2.180294  | -2.325945 | 3.441106  | C | 16.755491 | -2.878907 | -0.960197 |
| C | 2.138120  | -1.690146 | 2.193079  | H | 15.850860 | -2.306127 | -0.766888 |
| H | 3.049103  | -1.538431 | 1.621373  | C | 17.905670 | -4.875250 | -1.629828 |
| C | 0.971478  | -2.528036 | 4.120959  | H | 17.889439 | -5.902739 | -1.977953 |
| H | 0.976043  | -3.021820 | 5.086712  | C | 19.105127 | -4.219318 | -1.390171 |
| C | -0.214939 | -2.087773 | 3.550301  | H | 20.059150 | -4.711524 | -1.539325 |
| H | -1.165745 | -2.228642 | 4.050414  | C | 19.078841 | -2.906707 | -0.940206 |
| C | -0.173103 | -1.449961 | 2.320052  | H | 19.989461 | -2.351393 | -0.732271 |
| H | -1.073211 | -1.078421 | 1.841320  | N | 17.918558 | -2.269358 | -0.737486 |
| N | 0.985872  | -1.265140 | 1.665072  | C | 8.196087  | -5.939116 | -2.170471 |
| C | 9.358049  | -4.532967 | 8.479930  | C | 8.224542  | -7.333508 | -2.398074 |
| H | 10.179220 | -4.086190 | 9.043402  | C | 6.992392  | -7.995136 | -2.626484 |
| H | 8.451113  | -4.174259 | 8.966101  | H | 6.960301  | -9.047396 | -2.876096 |
| C | 9.440686  | -6.058330 | 8.502691  | C | 5.804435  | -7.304977 | -2.563165 |
| H | 10.391703 | -6.365582 | 8.052220  | H | 4.871563  | -7.830494 | -2.736988 |
| H | 8.650284  | -6.465632 | 7.858918  | C | 5.775230  | -5.921955 | -2.279772 |
| C | 9.304358  | -6.637424 | 9.912558  | C | 6.981033  | -5.255818 | -2.105396 |
| H | 9.518668  | -7.710974 | 9.870948  | H | 7.017590  | -4.187362 | -1.915301 |
| H | 10.067942 | -6.199866 | 10.570033 | C | 4.531940  | -5.233527 | -2.176677 |
| C | 7.920145  | -6.435098 | 10.531083 | C | 3.468919  | -4.662510 | -2.070787 |
| H | 7.156114  | -6.813582 | 9.835754  | C | 2.220701  | -3.996030 | -1.932760 |
| H | 7.711961  | -5.364899 | 10.670711 | C | 2.161641  | -2.746975 | -1.301075 |
| C | 7.761697  | -7.138359 | 11.878672 | H | 3.054480  | -2.260927 | -0.915625 |
| H | 7.945728  | -8.211060 | 11.745802 | C | 1.024457  | -4.553822 | -2.406203 |
| H | 8.535199  | -6.775381 | 12.566356 | H | 1.042712  | -5.520462 | -2.897879 |
| C | 6.381580  | -6.921009 | 12.491379 | C | -0.166309 | -3.860489 | -2.239781 |
| H | 6.285996  | -7.433262 | 13.450892 | H | -1.106364 | -4.264969 | -2.595802 |
| H | 6.191378  | -5.856576 | 12.660855 | C | -0.142861 | -2.628313 | -1.603706 |
| H | 5.595922  | -7.300454 | 11.830617 | H | -1.048587 | -2.051126 | -1.448404 |

|   |           |            |           |    |           |           |           |
|---|-----------|------------|-----------|----|-----------|-----------|-----------|
| N | 1.003086  | -2.096162  | -1.148333 | C  | 8.178128  | 4.980847  | 2.808470  |
| C | 9.409987  | -9.484891  | -2.555070 | C  | 8.218403  | 6.217814  | 3.489301  |
| H | 10.246752 | -9.892649  | -1.984885 | C  | 6.995143  | 6.761837  | 3.954242  |
| H | 8.517328  | -9.862972  | -2.057516 | H  | 6.974029  | 7.672493  | 4.538575  |
| C | 9.472837  | -9.927152  | -4.015598 | C  | 5.803324  | 6.126924  | 3.691629  |
| H | 10.393195 | -9.532185  | -4.461579 | H  | 4.876799  | 6.561411  | 4.051650  |
| H | 8.642432  | -9.463535  | -4.563494 | C  | 5.761981  | 4.915999  | 2.966402  |
| C | 9.413845  | -11.447482 | -4.173308 | C  | 6.960101  | 4.351429  | 2.549209  |
| H | 9.599649  | -11.694547 | -5.224279 | H  | 6.985137  | 3.412403  | 2.004288  |
| H | 10.230625 | -11.911325 | -3.603457 | C  | 4.514657  | 4.304860  | 2.651728  |
| C | 8.080503  | -12.065628 | -3.750302 | C  | 3.450069  | 3.809620  | 2.354465  |
| H | 7.261157  | -11.548323 | -4.270964 | C  | 2.196801  | 3.268319  | 1.960978  |
| H | 7.909345  | -11.917686 | -2.674669 | C  | 2.144416  | 2.044199  | 1.280005  |
| C | 8.000797  | -13.561543 | -4.052247 | H  | 3.048806  | 1.474309  | 1.080818  |
| H | 8.152166  | -13.717043 | -5.126955 | C  | 0.991166  | 3.939673  | 2.209782  |
| H | 8.828617  | -14.074056 | -3.547168 | H  | 1.005381  | 4.885615  | 2.740153  |
| C | 6.672337  | -14.175928 | -3.622391 | C  | -0.203243 | 3.387247  | 1.768989  |
| H | 6.634960  | -15.242736 | -3.851631 | H  | -1.150709 | 3.882840  | 1.944266  |
| H | 6.516104  | -14.059885 | -2.545224 | C  | -0.172621 | 2.180473  | 1.086834  |
| H | 5.834448  | -13.694764 | -4.136117 | H  | -1.079604 | 1.714557  | 0.715186  |
| N | 9.419372  | 6.870440   | 3.689760  | N  | 0.982419  | 1.534066  | 0.857239  |
| O | 9.391522  | 3.251268   | 1.753247  | C  | 9.411873  | 8.208599  | 4.296357  |
| C | 9.409470  | 4.323225   | 2.350640  | H  | 10.244490 | 8.776939  | 3.878489  |
| C | 10.653143 | 5.029627   | 2.673968  | H  | 8.515210  | 8.721724  | 3.948982  |
| C | 10.624748 | 6.271182   | 3.348421  | C  | 9.481351  | 8.169625  | 5.822108  |
| C | 11.858522 | 6.881100   | 3.666202  | H  | 10.436548 | 7.721895  | 6.120347  |
| H | 11.896951 | 7.803260   | 4.229770  | H  | 8.697875  | 7.498392  | 6.196917  |
| C | 13.045648 | 6.292465   | 3.290863  | C  | 9.318124  | 9.554550  | 6.451840  |
| H | 13.983774 | 6.773168   | 3.547499  | H  | 9.545778  | 9.480783  | 7.520751  |
| C | 13.072618 | 5.067343   | 2.593508  | H  | 10.060637 | 10.245374 | 6.029940  |
| C | 11.867117 | 4.441986   | 2.305732  | C  | 7.917004  | 10.146291 | 6.286955  |
| H | 11.846814 | 3.484153   | 1.792928  | H  | 7.175557  | 9.426210  | 6.663594  |
| C | 14.318226 | 4.487063   | 2.214035  | H  | 7.686368  | 10.305169 | 5.223656  |
| C | 15.389423 | 4.013660   | 1.908596  | C  | 7.742858  | 11.474299 | 7.022790  |
| C | 16.648263 | 3.439601   | 1.573029  | H  | 7.954583  | 11.322608 | 8.087796  |
| C | 16.701939 | 2.149829   | 1.033715  | H  | 8.491341  | 12.187869 | 6.657735  |
| H | 15.792619 | 1.580990   | 0.847771  | C  | 6.343983  | 12.058338 | 6.850678  |
| C | 17.852955 | 4.120305   | 1.783854  | H  | 6.239801  | 13.005726 | 7.383212  |
| H | 17.833565 | 5.123461   | 2.197074  | H  | 6.123697  | 12.243425 | 5.794642  |
| C | 19.052336 | 3.500683   | 1.462785  | H  | 5.583446  | 11.372689 | 7.236814  |
| H | 20.001921 | 4.001826   | 1.609760  | Pd | 9.326698  | -0.308880 | -0.093260 |
| C | 19.024969 | 2.215005   | 0.943597  | Pd | 26.107653 | -0.374228 | -0.011579 |
| H | 19.927192 | 1.670091   | 0.679908  | N  | 17.976709 | 7.489510  | -1.351022 |
| N | 17.866702 | 1.573242   | 0.740800  | O  | 17.895239 | 3.387805  | -1.628452 |

|   |           |          |           |   |           |           |           |
|---|-----------|----------|-----------|---|-----------|-----------|-----------|
| C | 17.913230 | 4.613818 | -1.556374 | H | 18.929237 | 9.188910  | -0.613954 |
| C | 19.162974 | 5.386411 | -1.616474 | H | 17.201851 | 9.216758  | -0.483177 |
| C | 19.156362 | 6.797976 | -1.547669 | C | 17.930369 | 9.735642  | -2.462402 |
| C | 20.391861 | 7.475785 | -1.691445 | H | 17.000487 | 9.477467  | -2.984981 |
| H | 20.435209 | 8.556163 | -1.708348 | H | 18.747876 | 9.427748  | -3.126501 |
| C | 21.564946 | 6.773706 | -1.845311 | C | 17.993537 | 11.241455 | -2.215239 |
| H | 22.499602 | 7.312785 | -1.957163 | H | 17.179167 | 11.530351 | -1.538566 |
| C | 21.574919 | 5.362234 | -1.863962 | H | 18.929428 | 11.488825 | -1.694004 |
| C | 20.364204 | 4.690170 | -1.760659 | C | 17.906873 | 12.052381 | -3.508252 |
| H | 20.310595 | 3.606136 | -1.797847 | H | 16.935184 | 11.863733 | -3.984595 |
| C | 22.802782 | 4.644628 | -1.979779 | H | 18.670646 | 11.688706 | -4.206889 |
| C | 23.845345 | 4.032449 | -2.053564 | C | 18.086100 | 13.557784 | -3.300789 |
| C | 25.036578 | 3.251697 | -2.067588 | H | 19.079541 | 13.747414 | -2.876063 |
| C | 25.074046 | 2.078250 | -1.304969 | H | 18.072564 | 14.048385 | -4.279221 |
| H | 24.213119 | 1.758154 | -0.728282 | C | 17.016886 | 14.183824 | -2.407653 |
| C | 26.180311 | 3.599337 | -2.797941 | H | 17.131439 | 15.268889 | -2.362553 |
| H | 26.184569 | 4.504845 | -3.394781 | H | 16.013704 | 13.970459 | -2.791847 |
| C | 27.294893 | 2.770880 | -2.750010 | H | 17.071807 | 13.807980 | -1.381575 |
| H | 28.192903 | 3.008539 | -3.307831 | N | 17.780208 | -8.116278 | 2.082064  |
| C | 27.250824 | 1.620719 | -1.974797 | O | 17.805879 | -4.026100 | 1.684759  |
| H | 28.094972 | 0.941410 | -1.913785 | C | 17.790716 | -5.246930 | 1.815992  |
| N | 26.157133 | 1.295272 | -1.264047 | C | 19.022673 | -6.033212 | 1.964540  |
| C | 16.693270 | 5.420282 | -1.427387 | C | 18.983175 | -7.435666 | 2.128178  |
| C | 16.755405 | 6.829432 | -1.354413 | C | 20.207331 | -8.113900 | 2.343342  |
| C | 15.537863 | 7.544516 | -1.293012 | H | 20.229299 | -9.178609 | 2.531812  |
| H | 15.525476 | 8.625811 | -1.298162 | C | 21.399856 | -7.426293 | 2.349314  |
| C | 14.333993 | 6.876664 | -1.259216 | H | 22.325920 | -7.964600 | 2.520435  |
| H | 13.410191 | 7.443422 | -1.213224 | C | 21.438967 | -6.031063 | 2.141947  |
| C | 14.273928 | 5.468302 | -1.292032 | C | 20.241040 | -5.353141 | 1.962196  |
| C | 15.462524 | 4.760092 | -1.390563 | H | 20.216356 | -4.276256 | 1.825481  |
| H | 15.468149 | 3.675747 | -1.443726 | C | 22.673803 | -5.318187 | 2.135293  |
| C | 13.014761 | 4.801132 | -1.225581 | C | 23.704261 | -4.683126 | 2.125196  |
| C | 11.934135 | 4.257492 | -1.169525 | C | 24.896915 | -3.907699 | 2.115096  |
| C | 10.656818 | 3.628263 | -1.097680 | C | 24.985424 | -2.794378 | 1.269631  |
| C | 10.561163 | 2.273247 | -0.765719 | H | 24.166865 | -2.539974 | 0.602319  |
| H | 11.445994 | 1.675736 | -0.555576 | C | 25.993796 | -4.205547 | 2.933643  |
| C | 9.470887  | 4.334536 | -1.333272 | H | 25.954024 | -5.067366 | 3.590826  |
| H | 9.518173  | 5.387333 | -1.590773 | C | 27.115566 | -3.387310 | 2.897266  |
| C | 8.253532  | 3.677917 | -1.230204 | H | 27.977992 | -3.589198 | 3.521385  |
| H | 7.318706  | 4.197982 | -1.402609 | C | 27.120607 | -2.290593 | 2.049347  |
| C | 8.241275  | 2.331302 | -0.896778 | H | 27.965905 | -1.612231 | 1.998585  |
| H | 7.321398  | 1.761983 | -0.792312 | N | 26.073614 | -2.017036 | 1.250973  |
| N | 9.379592  | 1.663701 | -0.675100 | C | 16.547879 | -6.026229 | 1.854600  |
| C | 18.014907 | 8.946548 | -1.159033 | C | 16.576104 | -7.430667 | 2.010879  |

|   |           |            |           |   |           |           |           |
|---|-----------|------------|-----------|---|-----------|-----------|-----------|
| C | 15.340443 | -8.112004  | 2.094918  | H | 20.303223 | -3.167017 | -8.730164 |
| H | 15.302554 | -9.177552  | 2.275970  | C | 21.417959 | -2.968312 | -6.943647 |
| C | 14.152988 | -7.424560  | 1.975080  | H | 22.355269 | -3.189788 | -7.442734 |
| H | 13.214678 | -7.965575  | 2.037729  | C | 21.417302 | -2.714784 | -5.554675 |
| C | 14.126096 | -6.028291  | 1.778521  | C | 20.203763 | -2.471397 | -4.926077 |
| C | 15.333215 | -5.344854  | 1.741061  | H | 20.142991 | -2.297807 | -3.855772 |
| H | 15.363615 | -4.266043  | 1.621347  | C | 22.638190 | -2.700559 | -4.818767 |
| C | 12.880989 | -5.355095  | 1.601692  | C | 23.679019 | -2.661338 | -4.201041 |
| C | 11.808821 | -4.818790  | 1.428945  | C | 24.907125 | -2.568171 | -3.489416 |
| C | 10.545524 | -4.198525  | 1.201823  | C | 24.976612 | -1.782903 | -2.331849 |
| C | 10.485194 | -2.868456  | 0.772397  | H | 24.101635 | -1.273095 | -1.937234 |
| H | 11.389075 | -2.279275  | 0.628875  | C | 26.074126 | -3.214128 | -3.920118 |
| C | 9.339756  | -4.888063  | 1.383189  | H | 26.048671 | -3.828229 | -4.813647 |
| H | 9.360079  | -5.920990  | 1.714902  | C | 27.248511 | -3.059726 | -3.195575 |
| C | 8.138170  | -4.237820  | 1.140473  | H | 28.164689 | -3.551751 | -3.500094 |
| H | 7.186089  | -4.737073  | 1.278648  | C | 27.240612 | -2.257501 | -2.063929 |
| C | 8.161354  | -2.918505  | 0.710078  | H | 28.132521 | -2.105358 | -1.464595 |
| H | 7.248028  | -2.363858  | 0.510207  | N | 26.122118 | -1.633830 | -1.657521 |
| N | 9.318803  | -2.269715  | 0.532961  | C | 16.545719 | -2.235958 | -5.741827 |
| C | 17.776615 | -9.585122  | 2.131696  | C | 16.617380 | -2.438337 | -7.138254 |
| H | 18.669741 | -9.941056  | 1.615040  | C | 15.404462 | -2.498436 | -7.861976 |
| H | 16.939281 | -9.938786  | 1.527491  | H | 15.398831 | -2.707581 | -8.923034 |
| C | 17.704304 | -10.143048 | 3.550194  | C | 14.197252 | -2.326199 | -7.221336 |
| H | 16.805619 | -9.754784  | 4.046238  | H | 13.277267 | -2.379901 | -7.793696 |
| H | 18.557954 | -9.769793  | 4.130022  | C | 14.128116 | -2.090489 | -5.832709 |
| C | 17.690033 | -11.670154 | 3.560877  | C | 15.312398 | -2.060568 | -5.110124 |
| H | 16.838991 | -12.026887 | 2.966414  | H | 15.313051 | -1.900457 | -4.036372 |
| H | 18.594224 | -12.050185 | 3.064839  | C | 12.868103 | -1.890963 | -5.194238 |
| C | 17.611862 | -12.242147 | 4.976611  | C | 11.791302 | -1.724387 | -4.665340 |
| H | 16.673323 | -11.912571 | 5.442939  | C | 10.528488 | -1.519252 | -4.036879 |
| H | 18.423883 | -11.812864 | 5.576730  | C | 10.475802 | -1.124884 | -2.695465 |
| C | 17.695858 | -13.768929 | 5.029699  | H | 11.382099 | -0.968448 | -2.115781 |
| H | 18.654984 | -14.092875 | 4.607640  | C | 9.319756  | -1.695999 | -4.720815 |
| H | 17.702409 | -14.080868 | 6.078878  | H | 9.332560  | -2.001122 | -5.761937 |
| C | 16.550960 | -14.470836 | 4.301746  | C | 8.123656  | -1.477427 | -4.052476 |
| H | 16.596796 | -15.551547 | 4.451531  | H | 7.170192  | -1.601564 | -4.552514 |
| H | 15.581165 | -14.123226 | 4.673475  | C | 8.156009  | -1.087402 | -2.720862 |
| H | 16.582760 | -14.290096 | 3.223153  | H | 7.253101  | -0.893619 | -2.149239 |
| N | 17.841691 | -2.579149  | -7.775256 | N | 9.315939  | -0.921172 | -2.072794 |
| O | 17.732266 | -2.066220  | -3.698298 | C | 17.887909 | -2.668872 | -9.242092 |
| C | 17.758367 | -2.226336  | -4.915622 | H | 18.818142 | -2.207914 | -9.578835 |
| C | 19.010869 | -2.449382  | -5.650199 | H | 17.095739 | -2.032418 | -9.640854 |
| C | 19.014664 | -2.654240  | -7.048179 | C | 17.761506 | -4.096029 | -9.767867 |
| C | 20.252145 | -2.941227  | -7.673802 | H | 16.831379 | -4.539830 | -9.390864 |

|   |           |           |            |   |           |           |           |
|---|-----------|-----------|------------|---|-----------|-----------|-----------|
| H | 18.577278 | -4.706556 | -9.360526  | C | 14.107510 | 1.023781  | 5.757542  |
| C | 17.781365 | -4.140927 | -11.294246 | C | 15.302357 | 1.099236  | 5.056359  |
| H | 16.971602 | -3.510073 | -11.683137 | H | 15.311631 | 1.157865  | 3.972018  |
| H | 18.718777 | -3.702347 | -11.664104 | C | 12.853498 | 0.973665  | 5.080139  |
| C | 17.639206 | -5.562681 | -11.838466 | C | 11.779928 | 0.918575  | 4.523283  |
| H | 16.670367 | -5.970998 | -11.519953 | C | 10.520974 | 0.818321  | 3.862784  |
| H | 18.408622 | -6.196187 | -11.379687 | C | 10.478320 | 0.438451  | 2.517467  |
| C | 17.752159 | -5.652828 | -13.361697 | H | 11.396116 | 0.241204  | 1.971081  |
| H | 18.740014 | -5.291856 | -13.672757 | C | 9.308388  | 1.059675  | 4.519054  |
| H | 17.706880 | -6.707260 | -13.651973 | H | 9.314125  | 1.354142  | 5.563232  |
| C | 16.665028 | -4.878080 | -14.103974 | C | 8.117294  | 0.913982  | 3.821726  |
| H | 16.727321 | -5.052002 | -15.180251 | H | 7.158341  | 1.092777  | 4.294049  |
| H | 15.668525 | -5.189643 | -13.773073 | C | 8.158395  | 0.528998  | 2.489962  |
| H | 16.751682 | -3.799286 | -13.943444 | H | 7.251460  | 0.407177  | 1.904445  |
| N | 17.795434 | 0.988569  | 7.806169   | N | 9.323279  | 0.299541  | 1.870087  |
| O | 17.754951 | 1.278951  | 3.706173   | C | 17.818321 | 0.796560  | 9.263021  |
| C | 17.757662 | 1.206142  | 4.932141   | H | 18.717735 | 0.230640  | 9.513301  |
| C | 19.001779 | 1.234694  | 5.714060   | H | 16.986806 | 0.141853  | 9.529141  |
| C | 18.985119 | 1.157601  | 7.124317   | C | 17.760652 | 2.104021  | 10.048080 |
| C | 20.220560 | 1.263566  | 7.809431   | H | 16.844401 | 2.646886  | 9.783416  |
| H | 20.258611 | 1.271981  | 8.890107   | H | 18.594736 | 2.747450  | 9.740869  |
| C | 21.401298 | 1.389480  | 7.113861   | C | 17.812222 | 1.863553  | 11.555442 |
| H | 22.335819 | 1.472233  | 7.658471   | H | 16.982896 | 1.205624  | 11.845168 |
| C | 21.417973 | 1.417455  | 5.702822   | H | 18.736332 | 1.325086  | 11.809959 |
| C | 20.208898 | 1.351382  | 5.024566   | C | 17.748469 | 3.163540  | 12.357390 |
| H | 20.162985 | 1.394065  | 3.940502   | H | 16.785545 | 3.655510  | 12.164139 |
| C | 22.645698 | 1.514003  | 4.983512   | H | 18.524849 | 3.845710  | 11.989095 |
| C | 23.678381 | 1.580472  | 4.354974   | C | 17.923316 | 2.964609  | 13.864442 |
| C | 24.873351 | 1.626083  | 3.582818   | H | 18.910120 | 2.526477  | 14.057956 |
| C | 24.957305 | 0.859357  | 2.413401   | H | 17.924404 | 3.946686  | 14.347819 |
| H | 24.125706 | 0.236136  | 2.091924   | C | 16.840542 | 2.092282  | 14.496361 |
| C | 25.978833 | 2.408207  | 3.943037   | H | 16.952833 | 2.054972  | 15.582008 |
| H | 25.941591 | 3.007359  | 4.846349   | H | 15.843167 | 2.488704  | 14.278122 |
| C | 27.107204 | 2.409033  | 3.132918   | H | 16.881669 | 1.062317  | 14.129491 |
| H | 27.975766 | 3.007273  | 3.381290   | B | 13.548488 | -0.214900 | 0.586156  |
| C | 27.113044 | 1.628955  | 1.986357   | F | 14.782926 | -0.381263 | -0.107991 |
| H | 27.967443 | 1.603383  | 1.317817   | F | 12.464937 | -0.353903 | -0.318771 |
| N | 26.056573 | 0.868913  | 1.649990   | F | 13.443139 | -1.199019 | 1.564054  |
| C | 16.528335 | 1.103775  | 5.726780   | F | 13.507531 | 1.059353  | 1.141390  |
| C | 16.578941 | 1.023848  | 7.136561   | B | 5.040399  | -0.421414 | 0.425341  |
| C | 15.355766 | 0.988459  | 7.842859   | F | 6.172772  | -0.182733 | -0.375122 |
| H | 15.335713 | 0.988921  | 8.924078   | F | 3.850202  | -0.267040 | -0.354687 |
| C | 14.156305 | 0.983402  | 7.165759   | F | 5.062644  | -1.732685 | 0.896623  |
| H | 13.227479 | 0.953267  | 7.725393   | F | 4.998934  | 0.492945  | 1.469385  |



|   |           |           |           |
|---|-----------|-----------|-----------|
| B | 22.218181 | -0.885525 | 0.240734  |
| F | 23.314670 | -0.065906 | -0.156467 |
| F | 21.006154 | -0.232136 | -0.059723 |
| F | 22.299829 | -2.081880 | -0.472510 |
| F | 22.315289 | -1.110810 | 1.609338  |
